# Supplementary material for: Rapid Generation of Barley Homozygous Transgenic Lines Based on Microspore Culture: HvPR1 Overexpression as an Example
Source: MDPI journal article supplement (doi:10.3390/ijms24054945), 2023-03-03
Supplement: s1 [file s1]

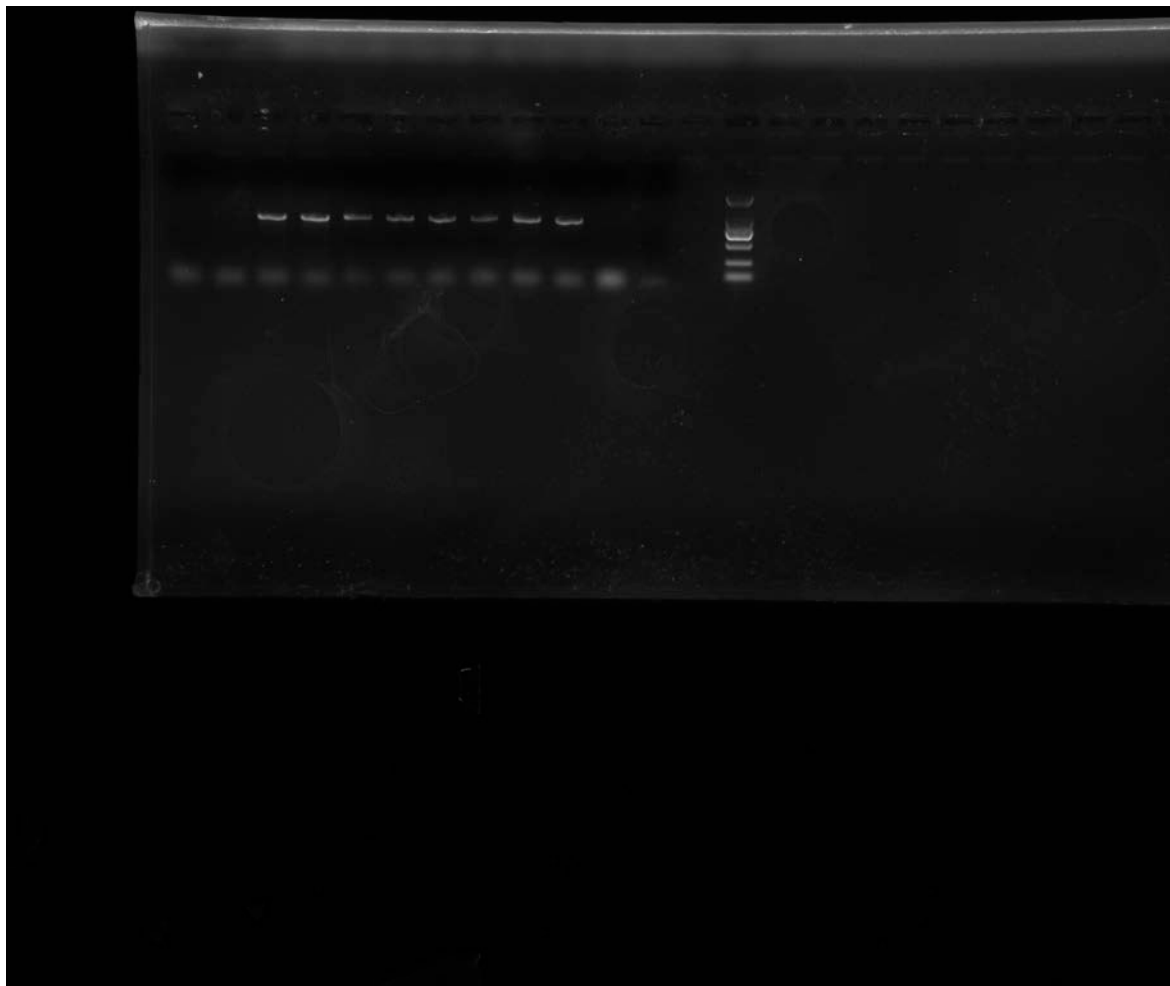

**Figure S1.** Gel picture of PCR products for detection of transgenic T<sub>0</sub> plants (The original picture for Figure 1B)

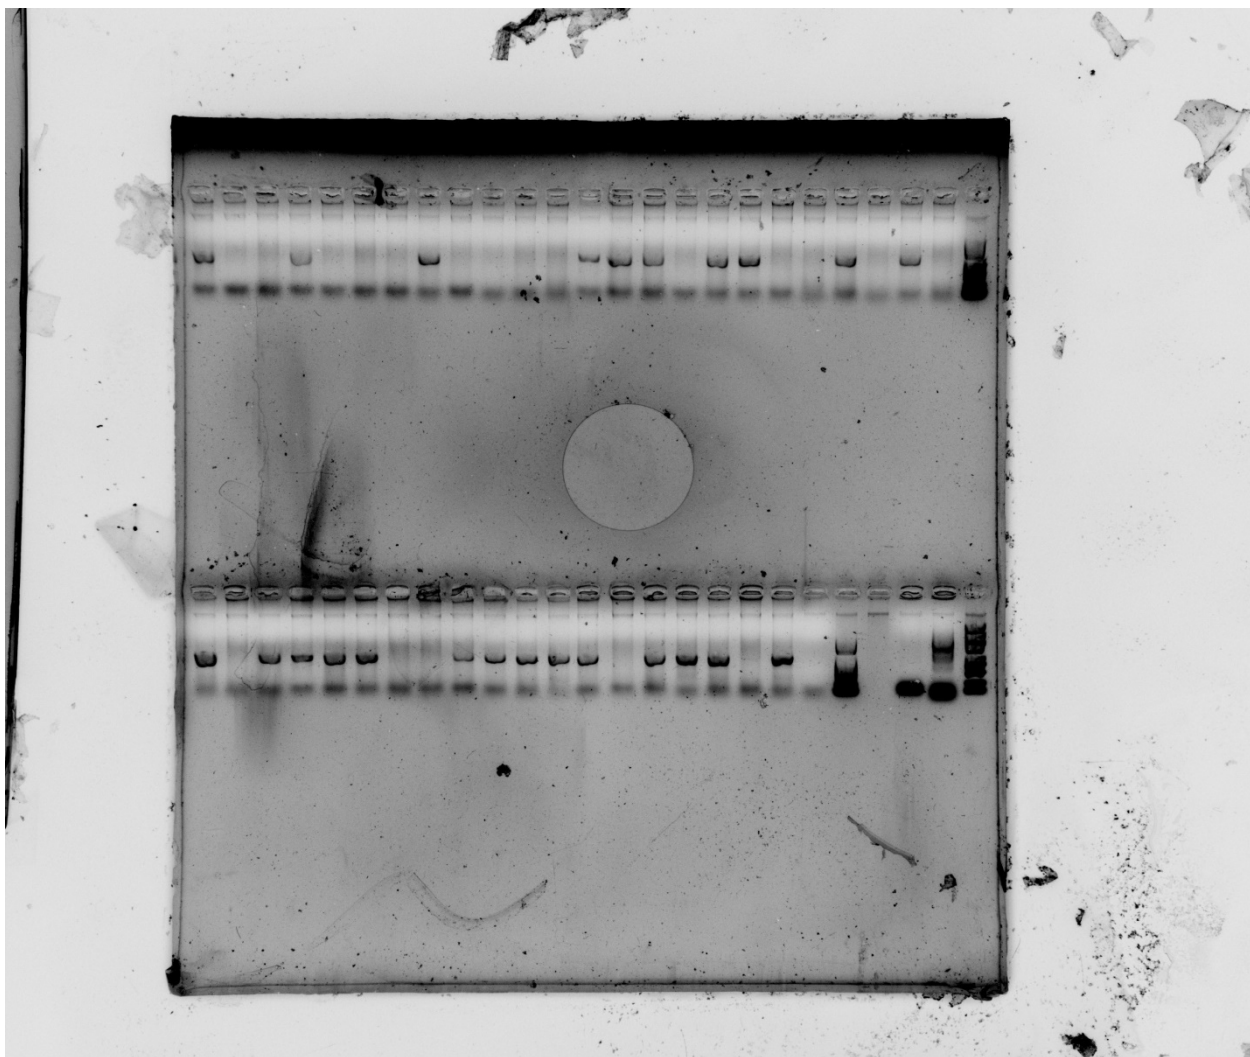

**Figure S2.** Gel picture of PCR products for detection of transgenic DH<sub>0</sub> plants. (The original picture for Figure 1D, and the products of last three lanes are not relevant to this experiment.)
